# Supplementary material for: Predictive Score of Adverse Events After Carotid Endarterectomy: The NSQIP Registry Carotid Endarterectomy Scale
Source: PubMed Central journal article supplement — J Am Heart Assoc. 2019 Oct 30;8(21):e013412. doi: 10.1161/JAHA.119.013412 (PMC6898838; doi:10.1161/jaha.119.013412), 2019-10-30
Supplement: JAH3-8-e013412-s001.pdf [file JAH3-8-e013412-s001.pdf]

# **SUPPLEMENTAL MATERIAL**

**Table S1. The demographics and preoperative characteristics of the derivation population (NSQIP 2011-2013) and univariable logistic regression evaluating thirty-day stroke, death or myocardial infarction.**

| <b>Variable</b>                       | <b>Definition</b> | <b>Total Pop. (n = 10,766)</b> | <b>No Stroke, Death, or MI (n = 10,339)</b> | <b>Stroke, Death, or MI (n = 427)</b> | <b>OR</b> | <b>95% CI</b> | <b>P-value</b> |
|---------------------------------------|-------------------|--------------------------------|---------------------------------------------|---------------------------------------|-----------|---------------|----------------|
| <b>Age (years)</b>                    | 18-70             | 44.7                           | 44.8                                        | 40.3                                  | Ref.      | --            | --             |
|                                       | 71-80             | 37.3                           | 37.3                                        | 35.1                                  | 1.05      | 0.84 - 1.31   | 0.69           |
|                                       | >80               | 18.1                           | 17.8                                        | 24.6                                  | 1.54      | 1.20 - 1.97   | 0.001*         |
| <b>Sex</b>                            | Male              | 60.9                           | 60.9                                        | 61.8                                  | Ref.      | --            | --             |
|                                       | Female            | 39.1                           | 39.2                                        | 38.2                                  | 0.96      | 0.79 - 1.17   | 0.68           |
| <b>Race or Ethnicity</b>              | White             | 86.6                           | 86.6                                        | 86.2                                  | Ref.      | --            | --             |
|                                       | African-American  | 4.4                            | 4.5                                         | 3.8                                   | 0.84      | 0.51 - 1.40   | 0.51           |
|                                       | Hispanic          | 2.4                            | 2.4                                         | 2.3                                   | 0.99      | 0.52 - 1.88   | 0.97           |
|                                       | Asian             | 1.9                            | 1.9                                         | 3.3                                   | 1.75      | 1.01 - 3.04   | 0.05           |
|                                       | Unknown           | 4.7                            | 4.7                                         | 4.5                                   | 0.96      | 0.60 - 1.54   | 0.86           |
| <b>Preoperative Functional Status</b> | Independent       | 96.5                           | 96.7                                        | 93.0                                  | Ref.      | --            | --             |
|                                       | Dependent         | 3.3                            | 3.2                                         | 7.0                                   | 2.30      | 1.56 - 3.39   | <0.001*        |
|                                       | Missing           | 0.2                            | 0.2                                         | 0.00                                  | --        | --            | --             |
| <b>Smoking</b>                        |                   | 26.6                           | 26.5                                        | 27.6                                  | 1.06      | 0.85 - 1.31   | 0.61           |
| <b>Hypertension</b>                   |                   | 85.2                           | 85.1                                        | 88.3                                  | 1.32      | 0.98 -        | 0.07           |

|                                    |                      |      |      |      |      |             |         |
|------------------------------------|----------------------|------|------|------|------|-------------|---------|
|                                    |                      |      |      |      |      | 1.79        |         |
| <b>COPD</b>                        |                      | 10.0 | 9.9  | 13.1 | 1.38 | 1.03 - 1.84 | 0.03*   |
| <b>CHF</b>                         |                      | 1.4  | 1.3  | 3.8  | 2.88 | 1.70 - 4.87 | <0.001* |
| <b>Dyspnea</b>                     |                      | 13.9 | 13.8 | 15.2 | 1.12 | 0.85 - 1.47 | 0.42    |
| <b>Diabetes Mellitus</b>           | None                 | 71.1 | 71.4 | 62.1 | Ref. | --          | --      |
|                                    | Non-Insulin          | 18.2 | 18.0 | 22.0 | 1.41 | 1.10 - 1.79 | 0.006*  |
|                                    | Insulin              | 10.8 | 10.5 | 15.9 | 1.74 | 1.32 - 2.29 | <0.001* |
| <b>Bleeding Disorder</b>           |                      | 20.8 | 20.6 | 24.6 | 1.26 | 1.00 - 1.58 | 0.05    |
| <b>Body Habitus</b>                | Normal Weight        | 28.3 | 28.2 | 30.2 | Ref. | --          | --      |
|                                    | Overweight           | 38.2 | 38.2 | 38.4 | 0.94 | 0.74 - 1.19 | 0.60    |
|                                    | Class I Obesity      | 21.6 | 21.6 | 21.1 | 0.91 | 0.69 - 1.20 | 0.51    |
|                                    | Class II/III Obesity | 11.0 | 11.1 | 9.1  | 0.77 | 0.53 - 1.11 | 0.16    |
|                                    | Missing              | 0.9  | 0.9  | 1.2  | 1.29 | 0.51 - 3.22 | 0.59    |
| <b>Weight Loss</b>                 |                      | 0.5  | 0.4  | 1.2  | 2.65 | 1.05 - 6.71 | 0.04*   |
| <b>Preoperative Sodium (mEq/L)</b> | >135                 | 86.1 | 86.0 | 88.1 | Ref. | --          | --      |
|                                    | ≤135                 | 10.1 | 10.2 | 9.1  | 0.88 | 0.63 - 1.23 | 0.45    |
|                                    | Missing              | 3.8  | 3.8  | 2.8  | 0.72 | 0.40 - 1.29 | 0.27    |
| <b>Preoperative</b>                | ≥40                  | 86.2 | 86.4 | 81.7 | Ref. | --          | --      |

|                                                                                  |                  |      |      |      |      |                |         |
|----------------------------------------------------------------------------------|------------------|------|------|------|------|----------------|---------|
| <b>GFR<br/>(mL/min/1.73<br/>m<sup>2</sup>)</b>                                   | <40              | 10.6 | 10.3 | 16.4 | 1.66 | 1.29 -<br>2.18 | <0.001* |
|                                                                                  | Missing          | 3.2  | 3.3  | 1.9  | 0.60 | 0.30 -<br>1.23 | 0.16    |
| <b>Preoperative<br/>White Blood<br/>Cell Count<br/>(cells/<math>\mu</math>L)</b> | 4,000–<br>12,000 | 90.1 | 90.0 | 91.8 | Ref. | --             | --      |
|                                                                                  | >12,000          | 3.7  | 3.8  | 3.0  | 0.79 | 0.45 -<br>1.39 | 0.42    |
|                                                                                  | <4,000           | 1.8  | 1.8  | 0.7  | 0.39 | 0.12 -<br>1.21 | 0.10    |
|                                                                                  | Missing          | 4.4  | 4.4  | 4.5  | 0.99 | 0.62 -<br>1.58 | 0.96    |
| <b>Preoperative<br/>Hematocrit (%)</b>                                           | >36              | 73.8 | 74.1 | 64.6 | Ref. | --             | --      |
|                                                                                  | $\leq$ 36        | 23.0 | 22.7 | 32.3 | 1.64 | 1.33 -<br>2.02 | <0.001* |
|                                                                                  | Missing          | 3.2  | 3.2  | 3.0  | 1.09 | 0.62 -<br>1.92 | 0.76    |
| <b>Preoperative<br/>Platelet Count<br/>(platelets/<math>\mu</math>L)</b>         | $\geq$ 150,000   | 85.2 | 85.3 | 84.1 | Ref. | --             | --      |
|                                                                                  | <150,000         | 10.3 | 10.3 | 11.7 | 1.16 | 0.85 -<br>1.56 | 0.35    |
|                                                                                  | Missing          | 4.5  | 4.5  | 4.2  | 0.96 | 0.59 -<br>1.55 | 0.86    |
| <b>Preoperative<br/>PTT (seconds)</b>                                            | <50              | 56.7 | 56.6 | 60.0 | Ref. | --             | --      |
|                                                                                  | 50-80            | 3.7  | 3.6  | 5.2  | 1.35 | 0.86 -<br>2.10 | 0.20    |
|                                                                                  | >80              | 1.3  | 1.3  | 1.6  | 1.17 | 0.54 -<br>2.52 | 0.69    |
|                                                                                  | Missing          | 38.3 | 38.5 | 33.3 | 0.82 | 0.66 -<br>1.01 | 0.06    |
| <b>Preoperative<br/>INR</b>                                                      | >1.4             | 71.5 | 71.3 | 75.4 | Ref. | --             | --      |
|                                                                                  | $\leq$ 1.4       | 3.5  | 3.5  | 4.2  | 1.15 | 0.70 -         | 0.57    |

|                                                 |                                |      |      |      |      |             |         |
|-------------------------------------------------|--------------------------------|------|------|------|------|-------------|---------|
|                                                 |                                |      |      |      |      | 1.86        |         |
|                                                 | Missing                        | 25.0 | 25.2 | 20.4 | 0.76 | 0.60 - 0.97 | 0.03*   |
| <b>Steroid Usage</b>                            |                                | 3.1  | 3.1  | 3.8  | 1.24 | 0.74 - 2.06 | 0.42    |
| <b>Symptomatic Status</b>                       | Asymptomatic                   | 56.9 | 57.3 | 46.6 | Ref. | --          | --      |
|                                                 | Amaurosis Fugax                | 7.1  | 7.2  | 5.2  | 0.88 | 0.56 - 1.38 | 0.58    |
|                                                 | TIA                            | 15.7 | 15.6 | 19.2 | 1.51 | 1.16 - 1.97 | 0.002*  |
|                                                 | Stroke                         | 18.4 | 18.1 | 27.4 | 1.87 | 1.48 - 2.36 | <0.001* |
|                                                 | Missing                        | 1.9  | 1.9  | 1.6  | 1.05 | 0.49 - 2.27 | 0.90    |
| <b>Preoperative Modified Rankin Scale Score</b> | 0-1                            | 7.6  | 7.6  | 5.9  | Ref. | --          | --      |
|                                                 | 2-5                            | 7.8  | 7.8  | 15.2 | 2.66 | 1.66 - 4.26 | <0.001* |
|                                                 | Not Recorded                   | 3.0  | 3.1  | 6.3  | 2.76 | 1.59 - 4.84 | <0.001* |
|                                                 | Presentation Other Than Stroke | 81.9 | 81.6 | 72.6 | 1.15 | 0.76 - 1.74 | 0.50    |
| <b>High-Risk Physiology</b>                     | No                             | 93.3 | 93.6 | 85.5 | Ref. | --          | --      |
|                                                 | Yes                            | 4.9  | 4.6  | 11.5 | 2.74 | 2.01 - 3.74 | <0.001* |
|                                                 | Missing                        | 1.9  | 1.8  | 3.0  | 1.82 | 1.03 - 3.23 | 0.04*   |
| <b>High-Risk Anatomy</b>                        | No                             | 86.3 | 86.5 | 79.9 | Ref. | --          | --      |
|                                                 | Yes                            | 11.9 | 11.6 | 17.6 | 1.64 | 1.27 - 2.12 | <0.001* |

|                                              |                              |      |      |      |      |             |        |
|----------------------------------------------|------------------------------|------|------|------|------|-------------|--------|
|                                              | Missing                      | 1.9  | 1.9  | 2.6  | 1.51 | 0.82 - 2.80 | 0.19   |
| <b>Preoperative Antiplatelet Agents</b>      | No                           | 11.2 | 11.2 | 10.1 | Ref. | --          | --     |
|                                              | Yes                          | 88.2 | 88.2 | 88.1 | 1.11 | 0.81 - 1.53 | 0.52   |
|                                              | Missing                      | 0.6  | 0.6  | 1.9  | 3.78 | 1.70 - 8.42 | 0.001* |
| <b>Preoperative Statin</b>                   | No                           | 19.8 | 19.9 | 19.2 | Ref. | --          | --     |
|                                              | Yes                          | 79.6 | 79.6 | 79.9 | 1.04 | 0.81 - 1.33 | 0.77   |
|                                              | Missing                      | 0.6  | 0.5  | 0.9  | 1.82 | 0.65 - 5.15 | 0.26   |
| <b>Preoperative Beta-Blocker</b>             | No                           | 43.5 | 43.7 | 38.9 | Ref. | --          | --     |
|                                              | Yes                          | 55.6 | 55.4 | 60.7 | 1.23 | 1.01 - 1.50 | 0.04*  |
|                                              | Missing                      | 0.9  | 0.9  | 0.5  | 0.57 | 0.14 - 2.34 | 0.44   |
| <b>Ipsilateral Carotid Artery Stenosis</b>   | Mild/Moderate (<80%)         | 29.5 | 29.5 | 29.0 | Ref. | --          | --     |
|                                              | Severe (80-99%) or Occlusion | 68.8 | 68.8 | 68.6 | 1.01 | 0.82 - 1.26 | 0.90   |
|                                              | Not Obtained                 | 1.8  | 1.7  | 2.3  | 1.38 | 0.71 - 2.68 | 0.34   |
| <b>Contralateral Carotid Artery Stenosis</b> | Mild (<50%)                  | 49.9 | 50.2 | 42.4 | Ref. | --          | --     |
|                                              | Moderate (50-79%)            | 27.2 | 27.2 | 29.3 | 1.28 | 1.01 - 1.61 | 0.04*  |
|                                              | Severe (80-99%) or Occlusion | 10.5 | 10.4 | 14.5 | 1.66 | 1.23 - 2.23 | 0.001* |
|                                              | Not Obtained                 | 12.4 | 12.3 | 13.8 | 1.33 | 0.98 - 1.79 | 0.07   |

|                                |          |      |      |      |      |             |         |
|--------------------------------|----------|------|------|------|------|-------------|---------|
| <b>Admission Type</b>          | Home     | 93.3 | 93.6 | 86.2 | Ref. | --          | --      |
|                                | Transfer | 6.7  | 6.4  | 13.8 | 2.33 | 1.75 - 3.10 | <0.001* |
| <b>Emergent Operation</b>      |          | 2.5  | 2.4  | 5.4  | 2.37 | 1.53 - 3.67 | <0.001* |
| <b>ASA Class</b>               | I-II     | 7.4  | 7.5  | 4.7  | Ref. | --          | --      |
|                                | III      | 76.0 | 76.4 | 65.6 | 1.38 | 0.87 - 2.18 | 0.17    |
|                                | IV-V     | 16.5 | 16.0 | 29.5 | 2.97 | 1.84 - 4.79 | <0.001* |
|                                | Missing  | 0.1  | 0.1  | 0.2  | 6.48 | 0.75 - 56.4 | 0.09    |
| <b>Revision Endarterectomy</b> |          | 0.8  | 0.8  | 1.2  | 1.48 | 0.60 - 3.68 | 0.40    |

All data are presented as percentages.

\*Statistically significant difference by univariable logistic regression.

ASA: American Society of Anesthesiologists; AST: aspartase transferase; CEA: carotid endarterectomy; CHF: congestive heart failure; COPD: chronic obstructive pulmonary disease; GFR: glomerular filtration rate; INR: international normalized ratio; IU: international units; MAC: monitored anesthesia care; MI: myocardial infarction; PTT: partial thromboplastin time.

Glomerular filtration rate was calculated using the modified diet in renal disease study.

Severity of ipsilateral and contralateral carotid stenosis is recorded only when defined by Doppler ultrasound or angiogram.

Modified Rankin Scale score is only recorded among patients whose presentation was a stroke.

A hospital transfer includes from another acute care facility, from the emergency department, or from a nursing home.

An emergent operation is defined using physician documentation, and includes procedures performed within twelve hours of hospital admission.

Missing data for laboratory values includes patients in whom such testing was not obtained preoperatively.

**Table S2. Multivariable regression evaluating the predictors of stroke, death, or myocardial infarction in the derivation population, stratified by symptomatic status.**

| Variable                       | Definition       | Symptomatic (n=4,441) |           |         | Asymptomatic (n=6,120) |           |         |
|--------------------------------|------------------|-----------------------|-----------|---------|------------------------|-----------|---------|
|                                |                  | OR                    | 95% CI    | P-value | OR                     | 95% CI    | P-value |
| Age (years)                    | 18-70            | Ref.                  | --        | --      | --                     | --        | --      |
|                                | 71-80            | 0.81                  | 0.57-1.14 | 0.23    | --                     | --        | --      |
|                                | >80              | 1.47                  | 1.03-2.09 | 0.04*   | --                     | --        | --      |
| Race or Ethnicity              | White            | Ref.                  | --        | --      | --                     | --        | --      |
|                                | African-American | 0.86                  | 0.45-1.67 | 0.66    | --                     | --        | --      |
|                                | Hispanic         | 0.43                  | 0.15-1.21 | 0.11    | --                     | --        | --      |
|                                | Asian            | 2.00                  | 0.98-4.06 | 0.06    | --                     | --        | --      |
|                                | Unknown          | 0.74                  | 0.39-1.40 | 0.35    |                        |           |         |
| Preoperative Functional Status | Independent      | Ref.                  | --        | --      | --                     | --        | --      |
|                                | Dependent        | 1.45                  | 0.89-2.36 | 0.13    | --                     | --        | --      |
| Hypertension                   |                  | 1.67                  | 1.07-2.62 | 0.03*   | --                     | --        | --      |
| CHF                            |                  | 1.36                  | 0.58-3.17 | 0.48    | 1.08                   | 0.43–2.76 | 0.86    |
| COPD                           |                  | --                    | --        | --      | 1.40                   | 0.93–2.12 | 0.11    |
| Dyspnea                        |                  | 0.82                  | 0.53-1.28 | 0.39    | --                     | --        | --      |
| Diabetes Mellitus              | None             | Ref.                  | --        | --      | Ref.                   | --        | --      |
|                                | Insulin          | 1.38                  | 0.96-1.98 | 0.08    | 1.26                   | 0.87-1.81 | 0.22    |
|                                | Non-Insulin      | 1.25                  | 0.80-1.94 | 0.32    | 1.60                   | 1.07-2.40 | 0.02*   |
| Bleeding Disorder              |                  | --                    | --        | --      | 1.15                   | 0.80–1.64 | 0.46    |
| Body Habitus                   | Normal Weight    | Ref.                  | --        | --      | --                     | --        | --      |
|                                | Overweight       | 0.85                  | 0.60-1.20 | 0.36    | --                     | --        | --      |



|                                                     |                      |      |           |        |      |           |       |
|-----------------------------------------------------|----------------------|------|-----------|--------|------|-----------|-------|
|                                                     | Class I Obesity      | 0.93 | 0.62-1.39 | 0.72   | --   | --        | --    |
|                                                     | Class II/III Obesity | 0.61 | 0.34-1.09 | 0.10   | --   | --        | --    |
|                                                     | Missing              | 0.91 | 0.33-2.51 | 0.85   | --   | --        | --    |
| <b>Weight Loss</b>                                  |                      | 1.49 | 0.46-4.80 | 0.50   | --   | --        | --    |
| <b>Preoperative GFR (mL/min/1.73 m<sup>2</sup>)</b> | ≥40                  | Ref. | --        | --     | Ref. | --        | --    |
|                                                     | <40                  | 1.14 | 0.73-1.87 | 0.55   | 1.51 | 1.04-2.20 | 0.03* |
|                                                     | Missing              | 0.84 | 0.23-2.99 | 0.78   | 0.69 | 0.25-1.93 | 0.48  |
| <b>Preoperative Serum Albumin (g/dL)</b>            | ≥3.5                 | --   | --        | --     | Ref. | --        | --    |
|                                                     | <3.5                 | --   | --        | --     | 1.38 | 0.81–2.35 | 0.24  |
|                                                     | Missing              | --   | --        | --     | 0.90 | 0.55–1.49 | 0.70  |
| <b>Preoperative Hematocrit (%)</b>                  | >36                  | Ref. | --        | --     | --   | --        | --    |
|                                                     | ≤36                  | 1.64 | 1.20-2.24 | 0.002* | --   | --        | --    |
|                                                     | Missing              | 1.39 | 0.39-4.91 | 0.61   | --   | --        | --    |
| <b>Preoperative PTT (seconds)</b>                   | <50                  | --   | --        | --     | Ref. | --        | --    |
|                                                     | 50-80                | --   | --        | --     | 1.49 | 0.60–3.89 | 0.39  |
|                                                     | >80                  | --   | --        | --     | 0.63 | 0.07–5.27 | 0.67  |
|                                                     | Missing              | --   | --        | --     | 0.80 | 0.59–1.12 | 0.19  |
| <b>Preoperative AST (IU/L)</b>                      | ≤40                  | --   | --        | --     | Ref. | --        | --    |
|                                                     | >40                  | --   | --        | --     | 1.87 | 0.93–3.78 | 0.08  |
|                                                     | Missing              | --   | --        | --     | 1.23 | 0.75–2.03 | 0.41  |
| <b>Preoperative Modified Rankin Score</b>           | 0-1                  | Ref. | --        | --     | --   | --        | --    |
|                                                     | 2-5                  | 2.06 | 1.25-3.40 | 0.004* | --   | --        | --    |
|                                                     | Not Recorded         | 2.38 | 1.32-4.29 | 0.004* | --   | --        | --    |
|                                                     | Presentation         | 1.33 | 0.84-2.09 | 0.22   | --   | --        | --    |

|                                  |                              |      |            |        |      |           |        |
|----------------------------------|------------------------------|------|------------|--------|------|-----------|--------|
|                                  | other than Stroke            |      |            |        |      |           |        |
| <b>High-Risk Physiology</b>      |                              | 2.34 | 1.44-3.79  | 0.001* | 1.14 | 0.63–2.09 | 0.66   |
|                                  | Missing                      | 6.86 | 2.26-20.79 | 0.001* | 0.26 | 0.04–1.61 | 0.15   |
| <b>High-Risk Anatomy</b>         |                              | 1.24 | 0.84-1.83  | 0.28   | 1.35 | 0.88-2.08 | 0.17   |
|                                  | Missing                      | 0.36 | 0.10-1.32  | 0.12   | 2.16 | 0.56–8.41 | 0.27   |
| <b>Preoperative Statin</b>       |                              | --   | --         | --     | 1.17 | 0.79–1.75 | 0.44   |
| <b>Preoperative Beta-Blocker</b> |                              | --   | --         | --     | 1.29 | 0.94-1.77 | 0.12   |
| <b>Contralateral Stenosis</b>    | Mild (<50%)                  | Ref. | --         | --     | Ref. | --        | --     |
|                                  | Moderate (50-79%)            | 1.26 | 0.90-1.76  | 0.18   | 1.28 | 0.90–1.80 | 0.17   |
|                                  | Severe (80-99%) or Occlusion | 1.41 | 0.91-2.20  | 0.13   | 1.40 | 0.87–2.24 | 0.16   |
|                                  | Not Obtained                 | 1.28 | 0.80-2.06  | 0.30   | 1.64 | 1.08–2.49 | 0.02*  |
| <b>Admission Type</b>            | Home                         | Ref. | --         | --     | Ref. | --        | --     |
|                                  | Transfer                     | 1.70 | 1.17-2.47  | 0.006* | 2.51 | 1.33-4.76 | 0.005* |
|                                  | Missing                      | 0.13 | 0.02-0.96  | 0.05   | --   | --        | --     |
| <b>Emergent Operation</b>        |                              | 1.57 | 0.95-2.59  | 0.08   | --   | --        | --     |
| <b>ASA Class</b>                 | I-II                         | Ref. | --         | --     | Ref. | --        | --     |
|                                  | III                          | 0.80 | 0.42-1.52  | 0.49   | 1.38 | 0.69-2.74 | 0.36   |
|                                  | IV-V                         | 1.23 | 0.62-2.44  | 0.55   | 2.32 | 1.11–4.87 | 0.03*  |
|                                  | Missing                      | 4.53 | 0.38-53.9  | 0.23   | --   | --        | --     |
| <b>Revision Endarterectomy</b>   |                              | --   | --         | --     | 1.37 | 0.46–4.05 | 0.57   |

|                             |  |      |      |
|-----------------------------|--|------|------|
| <b>C-Statistic</b>          |  | 0.73 | 0.68 |
| <b>Hosmer-Lemeshow Test</b> |  | 0.48 | 0.73 |

\*Statistically significant difference.

ASA: American Society of Anesthesiologists; CHF: congestive heart failure; CI: Confidence Interval; GFR: glomerular filtration rate; PTT: partial thromboplastin time.

**Table S3. Prediction of the NSQIP CEA Scale in the validation population among asymptomatic patients on antiplatelet agents and statin preoperatively (n=3,340).**

| <b>Outcome</b>                                 | <b>Cumulative Incidence</b> | <b>C</b> | <b>OR</b> | <b>95% CI</b> | <b>P-value</b> | <b>HL</b> |
|------------------------------------------------|-----------------------------|----------|-----------|---------------|----------------|-----------|
| <b>Stroke, Death, or Myocardial Infarction</b> | 3.0% (95% CI: 2.4-3.6%)     | 0.65     | 1.15      | 1.10-1.19     | <0.001*        | 0.08      |
| <b>Stroke or Death</b>                         | 1.8% (95% CI: 1.3-2.9%)     | 0.66     | 1.15      | 1.09-1.21     | <0.001*        | 0.02      |
| <b>Death</b>                                   | 0.6% (95% CI: 0.3-0.9%)     | 0.75     | 1.23      | 1.13-1.33     | <0.001*        | 0.06      |
| <b>Stroke</b>                                  | 1.3% (95% CI: 0.9-1.9%)     | 0.62     | 1.10      | 1.04-1.18     | <0.001*        | 0.25      |
| <b>Myocardial Infarction</b>                   | 1.7% (95% CI: 1.4-1.9%)     | 0.64     | 1.14      | 1.08-1.20     | <0.001*        | 0.13      |
| <b>Cranial Nerve Deficit</b>                   | 3.5%: (95% CI: 2.9-4.2%)    | 0.55     | 1.04      | 1.00-1.09     | 0.07           | 0.94      |
| <b>Any Complication</b>                        | 8.2% (95% CI: 7.2-9.1%)     | 0.64     | 1.14      | 1.11-1.17     | <0.001*        | 0.63      |
| <b>Extended Hospital Stay</b>                  | 14.1% (95% CI: 12.9-15.3%)  | 0.65     | 1.14      | 1.11-1.17     | <0.001*        | 0.44      |
| <b>Non-Routine Discharge</b>                   | 2.4%: (95% CI: 1.9-2.9%)    | 0.72     | 1.20      | 1.15-1.26     | <0.001*        | 0.07      |
| <b>Unplanned Readmission</b>                   | 4.7%: (95% CI: 4.0-5.5%)    | 0.69     | 1.17      | 1.13-1.21     | <0.001*        | 0.08      |

CEA: carotid endarterectomy; CI: confidence interval; HL: Hosmer-Lemeshow Test; NSQIP: National Surgical Quality Improvement Program; OR: odds ratio.

\*Statistically significant differences by logistic regression.
